# Supplementary material for: Controllable synthesis of multi-layered gold spirangles
Source: Royal Society of Chemistry journal article supplement (doi:10.1039/c1jm13531g), 2011-01-01
Supplement: c1jm13531g.pdf [file c1jm13531g.pdf]

**Supporting Information for**

**Controllable Synthesis of Multi-Layered Gold Spirangles**

**Min Hoon Jang,<sup>a</sup> Jin Kyung Kim,<sup>b</sup> Hyeongun Tak,<sup>a</sup> and Hyojong Yoo\*<sup>a</sup>**

*<sup>a</sup>Department of Chemistry and Institute for Applied Chemistry, Hallym University, 39 Hallymdaehak-gil, Chuncheon-si, Gangwon-do, 200-702, Republic of Korea.  
E-mail: hyojong@hallym.ac.kr*

*<sup>b</sup>Samyang Genex Corporation, 63-2 Hwaam-dong, Yuseong-gu, Daejeon, 305-717, Republic of Korea*

E-mail: hyojong@hallym.ac.kr

## Experimental Section

Polyethylene (100) stearyl ether ( $(C_2H_4O)_{100}C_{18}H_{37}OH$ , Brij 700, Sigma–Aldrich), hydrogen tetrachloroaurate trihydrate ( $HAuCl_4 \cdot 3H_2O$ , 99.9%, Sigma–Aldrich), and sodium hydroxide (NaOH, 98.0%, Sigma–Aldrich) were used as received. All stock solutions were freshly prepared before each reaction. Prior to use, all glassware was washed with Aqua Regia (3:1 ratio by volume of HCl and  $HNO_3$ ; *Caution: Aqua Regia is highly toxic and corrosive and must be handled in fume hoods with proper personal protection equipment*) and rinsed thoroughly with nanopure water. In a typical experiment, Multy-layered gold spirangles were synthesized through the reduction of Au(III) ions ( $HAuCl_4$ ) using Brij700 and NaOH in aqueous solution. Aqueous Brij700 (1 mL; 5 wt%) was well mixed with NaOH (aq) (100  $\mu$ L; 10 mM) by shaking for 30 seconds. After mixing,  $HAuCl_4$  (aq) (100  $\mu$ L; 10 mM) was added, and the reaction mixture was shaken vigorously for more than 1 minute. The pale yellow reaction mixture was then placed in a 50 °C water bath for 6 hours. The mixture was then purified by centrifugation (2 min, at 2300 g), and redispersed three times in nanopure water, and imaged. For temperature-dependent synthesis of gold crystals, the temperature of water bath was controlled to 25 °C (single-layered gold plates) and 90 °C (gold rings), and reaction mixture (Brij700 (1 mL; 5 wt%) + NaOH (aq) (100  $\mu$ L; 10 mM) +  $HAuCl_4$  (aq) (100  $\mu$ L; 10 mM)) was placed for 6 hours. The resulting nanocrystals were imaged using a FEI 400F scanning electron microscope (SEM), and JEOL JEM-2010 Luminography (Fuji FDL-5000) Ultramicrotome (CRX) transmission electron microscope (TEM). TEM samples were prepared by concentrating the nanocrystal mixture using centrifugation (centrifuged twice for 1 min at 8000 rpm and resuspending pellets in 100  $\mu$ L of nanopure water) and immobilizing 10  $\mu$ L of the solution on a Formvar-coated Cu grid.

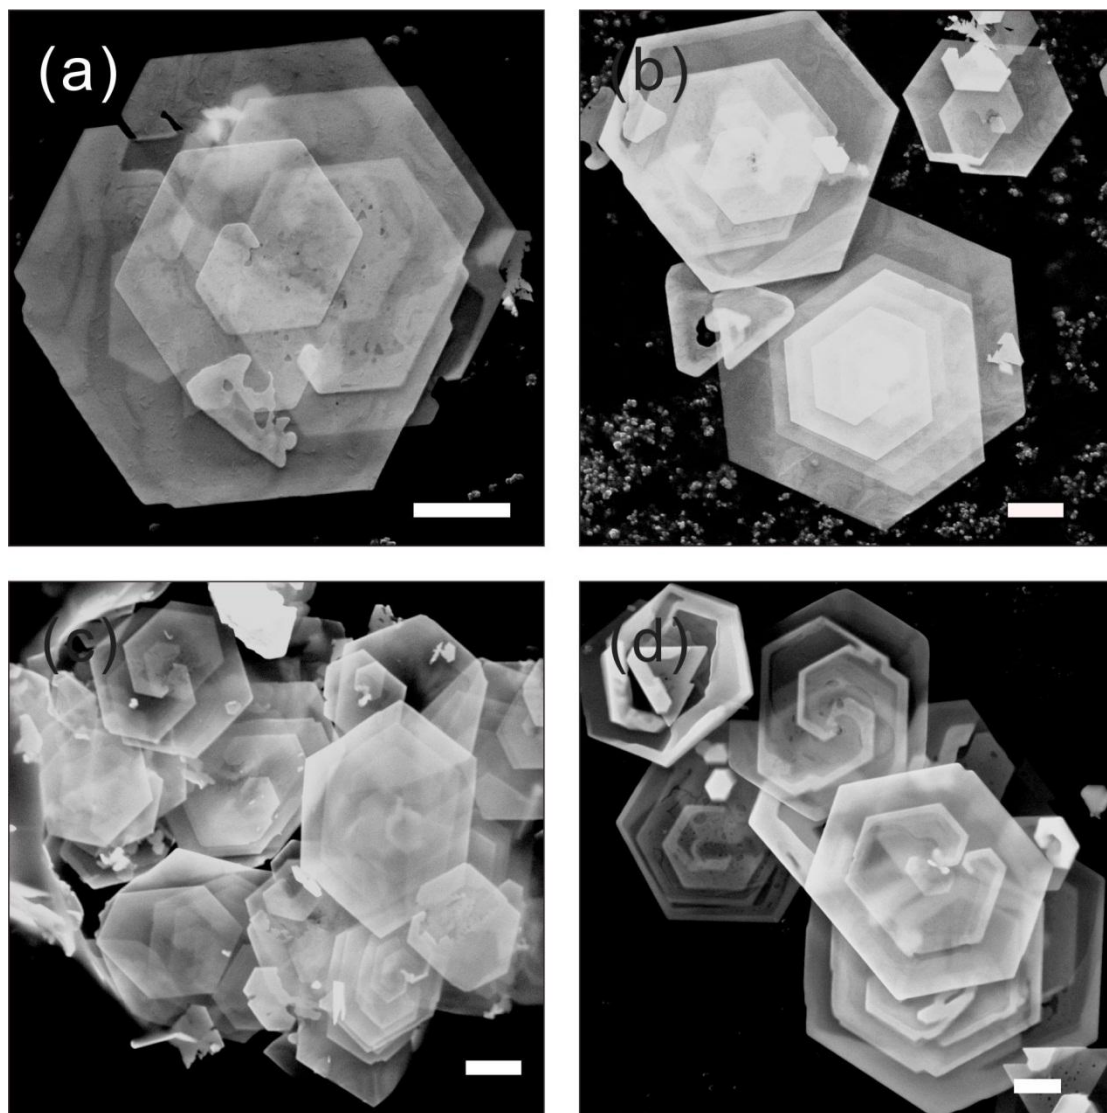

**Figure S1.** Scanning electron microscopy (SEM) images of gold spirangles synthesized from a mixture of 1 mL of Brij 700 aqueous solution (5 wt%), 0.1 mL of 10 mM NaOH (aq), and 0.1 mL of 10 mM HAuCl<sub>4</sub> (aq) after 6 h heating at 50 °C. Scale bars represent: 1 μm in (a), (b), and (d), and 2 μm in (c).

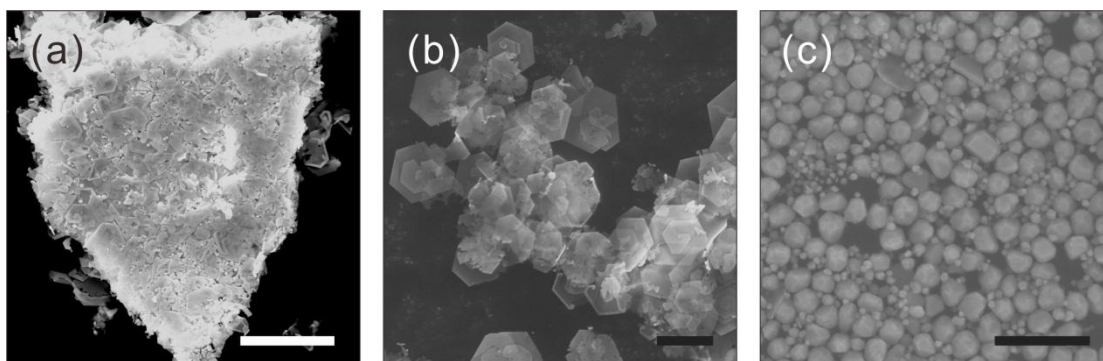

**Figure S2.** Scanning electron microscopy (SEM) Images of gold crystals synthesized after 6 h heating at 50 °C from a mixture of 0.1 mL of 10 mM HAuCl<sub>4</sub> (aq), 0.1 mL of 10 mM NaOH (aq), and 1 mL of (a) 2 wt%; (b) 5 wt%; (c) 10 wt% Brij 700 aqueous solution. Scale bars represent: 10 μm in (a), 5 μm in (b), and 1 μm in (c).

| Temperature | NaOH   | Brij   | Main Shape of Gold Particle      |
|-------------|--------|--------|----------------------------------|
| 90 °C       | 0.1 mL | 10 wt% | <b>Pseudo spherical particle</b> |
|             |        | 5 wt%  | <b>Ring</b>                      |
|             |        | 2 wt%  | <b>Ring and Plate</b>            |
| 50 °C       | 0.1 mL | 10 wt% | <b>Pseudo spherical particle</b> |
|             |        | 5 wt%  | <b>Spirange</b>                  |
|             |        | 2 wt%  | <b>Spirange and Plate</b>        |

**Table S1.** The summary of synthesized gold particle structures through the change of brij concentration (after 6 h heating at each temperature from a mixture of 0.1 mL of 10 mM HAuCl<sub>4</sub> (aq), 0.1 mL of 10 mM NaOH (aq), and 1 mL of each concentration of Brij 700 aqueous solution. cf. plate: single-layered plate)

| Temperature | Brij  | NaOH    | Main Shapes of Gold Particle                      |
|-------------|-------|---------|---------------------------------------------------|
| 90 °C       | 5 wt% | 0.2 mL  | <b>Sickle</b>                                     |
|             |       | 0.1 mL  | <b>Ring</b>                                       |
|             |       | 0.05 mL | <b>Ring, Plate, and pseudo spherical particle</b> |
|             |       | 0.02 mL | <b>Ring, Plate, and pseudo spherical particle</b> |
|             |       | 0       | <b>Pseudo spherical particle</b>                  |
| 50 °C       | 5 wt% | 0.2 mL  | <b>Sickle</b>                                     |
|             |       | 0.1 mL  | <b>Spirangle</b>                                  |
|             |       | 0.05 mL | <b>Spirangles and Plate</b>                       |
|             |       | 0.02 mL | <b>Plates and Pseudo spherical particle</b>       |
|             |       | 0       | <b>Plates and Pseudo spherical particle</b>       |
| 25 °C       | 5 wt% | 0.1 mL  | <b>Plate</b>                                      |

**Table S2.** The summary of gold particle structures through the change of temperature and the amount of NaOH. (synthesized from a mixture of 1 mL of Brij 700 aqueous solution (5 wt%), each amount of 10 mM NaOH (aq), and 0.1 mL of 10 mM HAuCl<sub>4</sub> (aq) after 6 h heating at each temperature, cf. plate: single-layered plate)
